# Supplementary material
Source: PubMed Central journal article supplement (PMC3039403)

**FIGURE S1. Comparison of the overall and active-site structures of GH20  $\beta$ -*N*-acetyl-D-hexosaminidases. (A) OfHex1. (B) SpHex. (C) SmCHB. (D) HsHexB.**

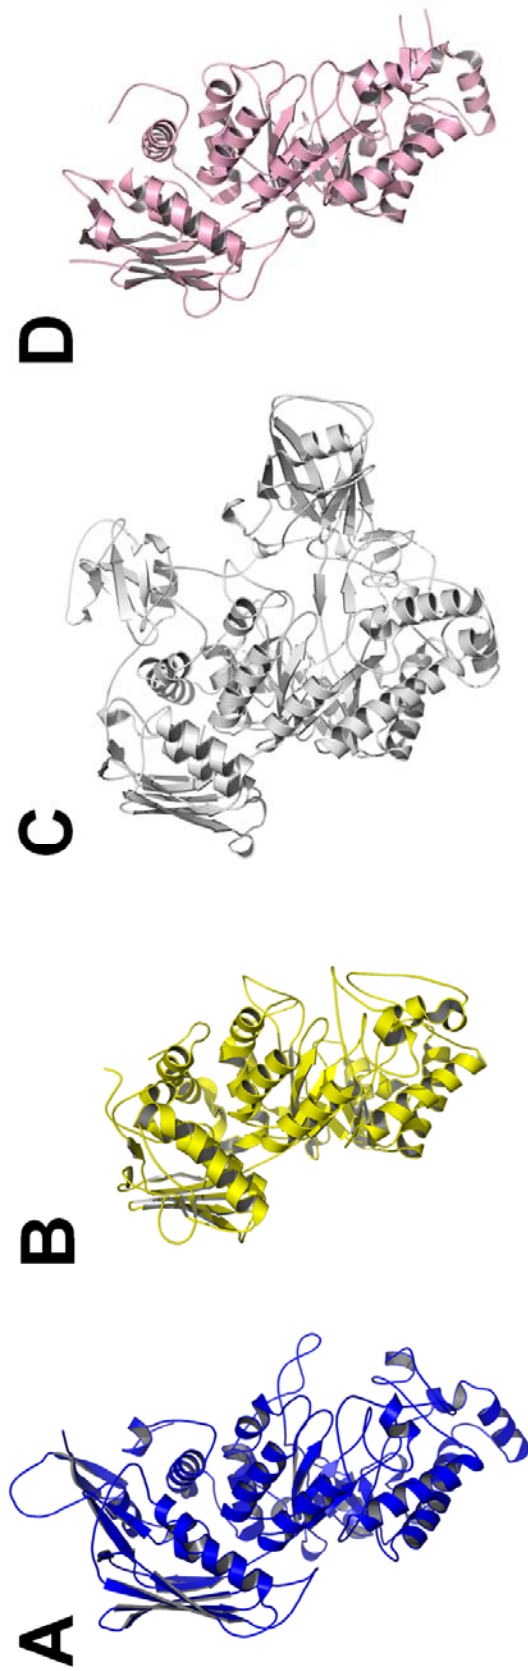

**FIGURE S2 Active site superposition of OfHex1(blue) in complex with TMG-chitotriomycin (green) and HsHexB (white) in complex with NGT (yellow).**

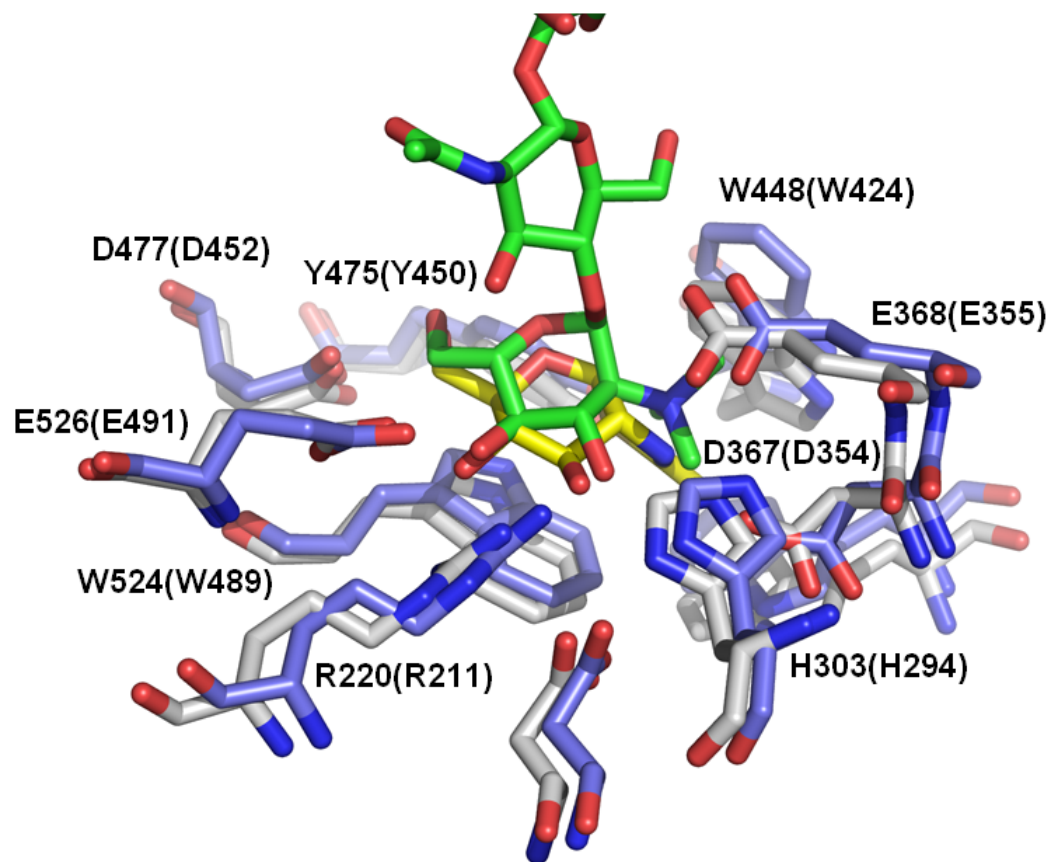

Supplement: supp_M110.184796_jbc.M110.184796-1.pdf [file supp_M110.184796_jbc.M110.184796-1.pdf]
